# Supplementary material
Source: PubMed Central journal article supplement (PMC5692556)

# Supporting Information

Andrew et al. 10.1073/pnas.1708568114

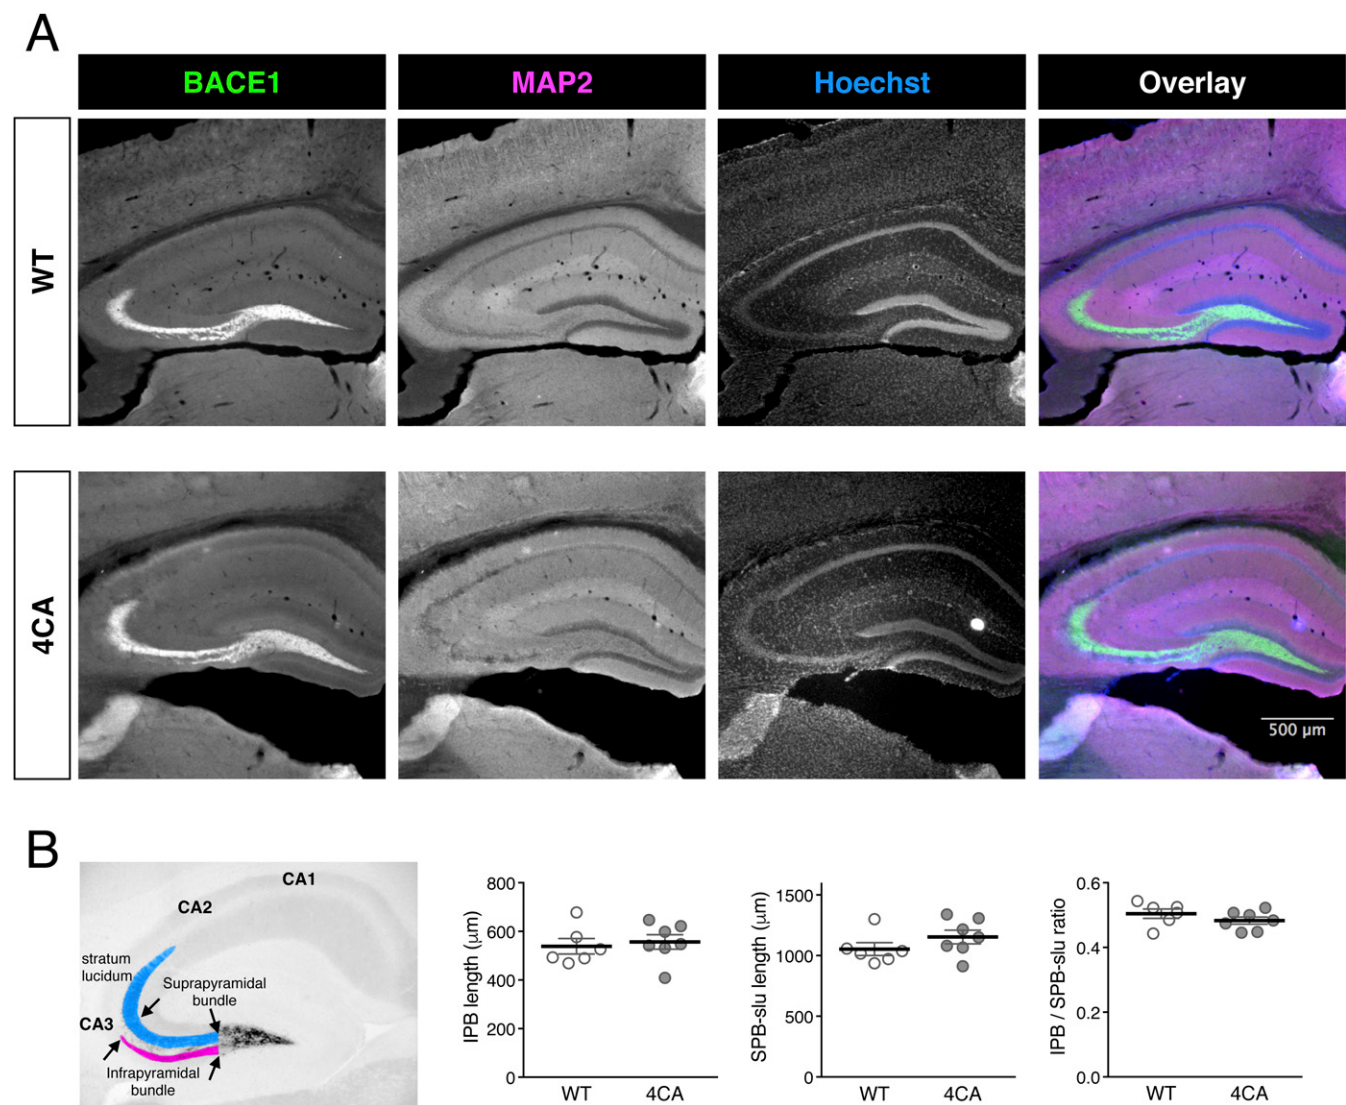

**Fig. S1.** The lack of BACE1 S-palmitoylation does not markedly affect prominent BACE1 localization in mossy fibers. (A) Coronal brain sections of WT and 4CA mice were immunolabeled using BACE1 (green) and MAP2 (magenta) antibodies to visualize mossy fiber localization of BACE1. (B, Left) Schematic representation of infrapyramidal bundle (IPB) and suprapyramidal bundle (SPB) to stratum lucidum (slu) length measurement. Quantification of IPB length, SPB-slu length, and IPB/SPB-slu ratio in WT and 4CA mice ( $n = 6$  WT and  $7$  4CA).

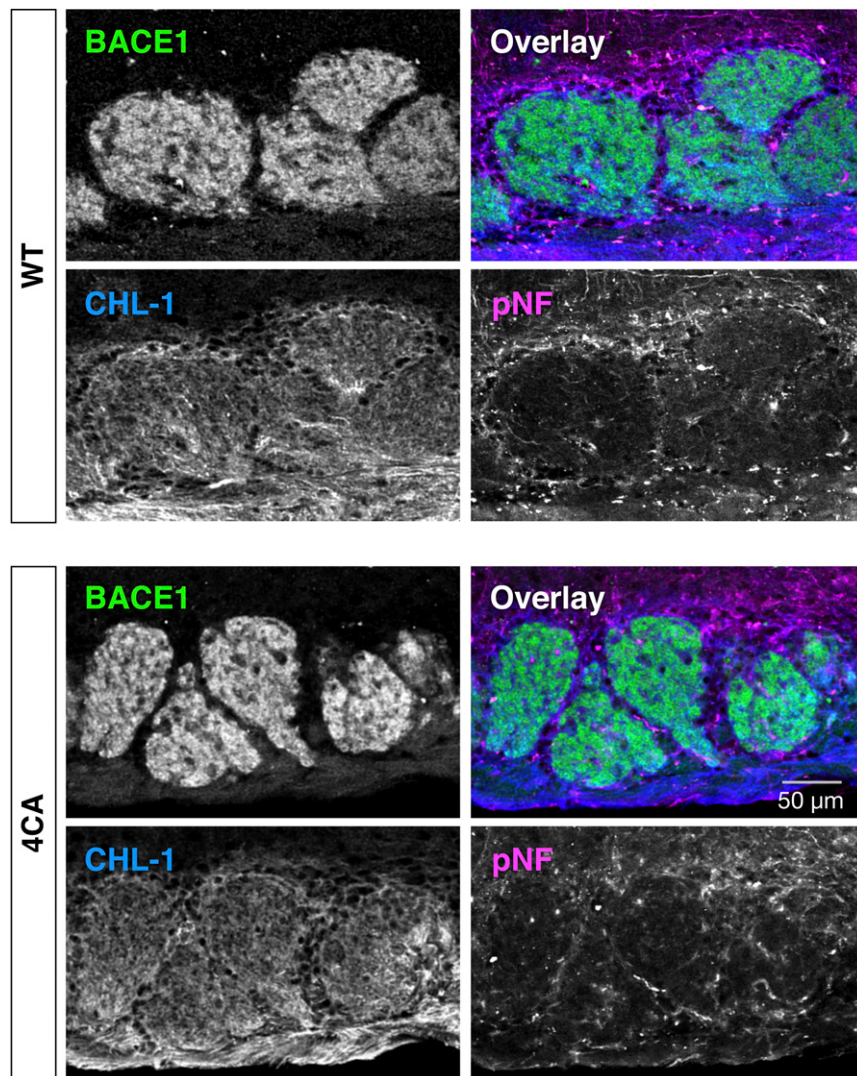

**Fig. S2.** The lack of BACE1 S-palmitoylation does not markedly affect BACE1 localization in the olfactory bulb. Olfactory bulb sections of WT and 4CA mice were immunolabeled using BACE1 (green), phospho-Neurofilament H (pNF, magenta), and CHL-1 (blue) antibodies to visualize BACE1 accumulation in the glomeruli.

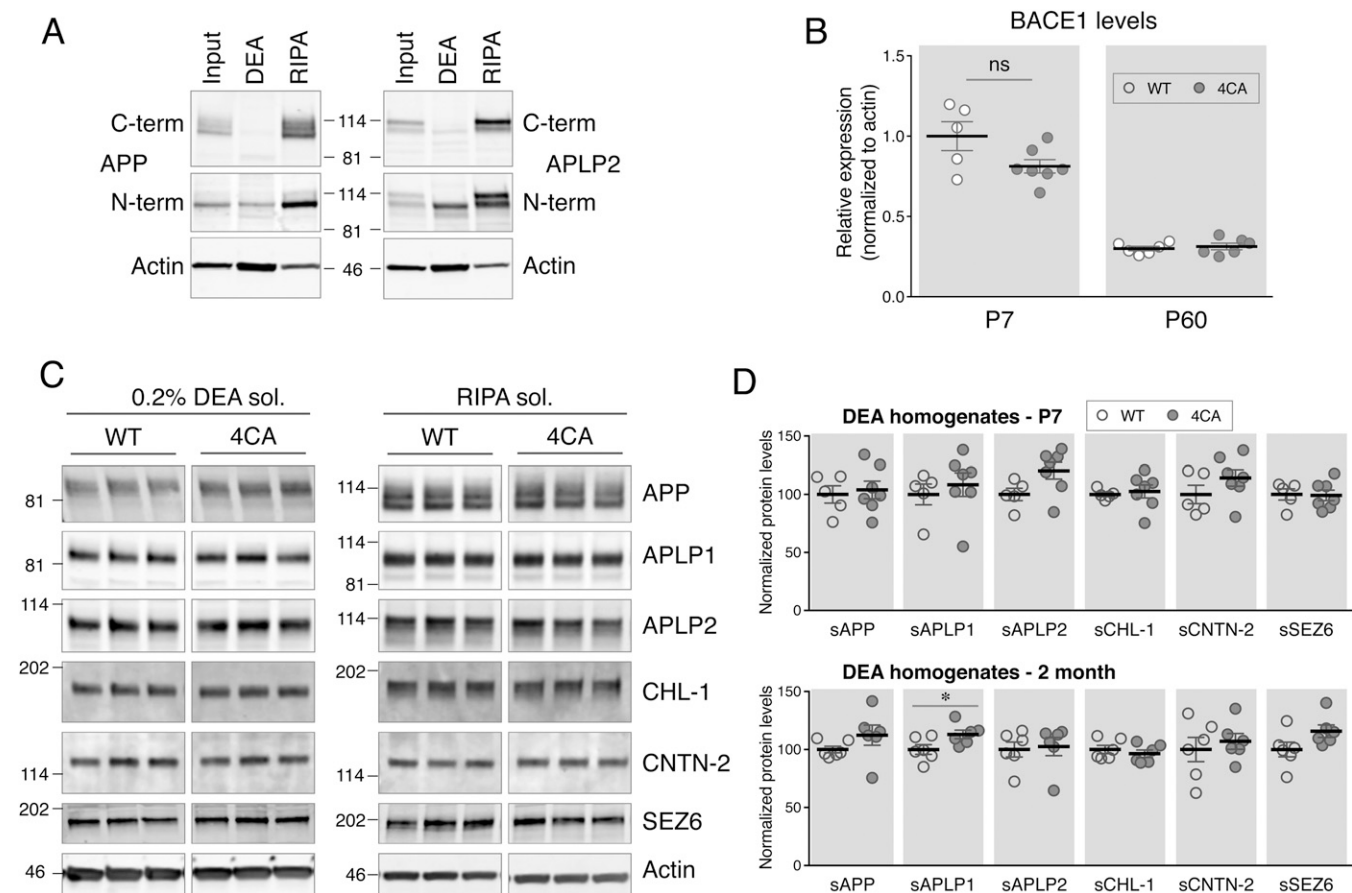

**Fig. S3.** Analysis of neuronal substrate processing. (A) Two-month-old WT and 4CA mouse brains were separated into a soluble protein fraction (0.2% DEA sol.) and a detergent-soluble membrane protein fraction (RIPA sol.). Aliquots of each fraction were analyzed by immunoblotting with N- and C-terminal antibodies to APP or APLP to confirm separation of soluble and membrane-bound proteins. (B) The levels of BACE1 at P7 and P60 in RIPA extracts were quantified by immunoblotting and normalized to the levels of actin. (C) DEA and RIPA lysates were analyzed by immunoblotting with the indicated antibodies. The results shown are representative blots from P7 mice. (D) The levels of indicated proteins in the DEA homogenates (normalized to actin) were quantified from P7 ( $n = 5$  WT and 7 4CA) and 2-mo-old mice ( $n = 6$  WT and 6 4CA). \* $P < 0.05$ .

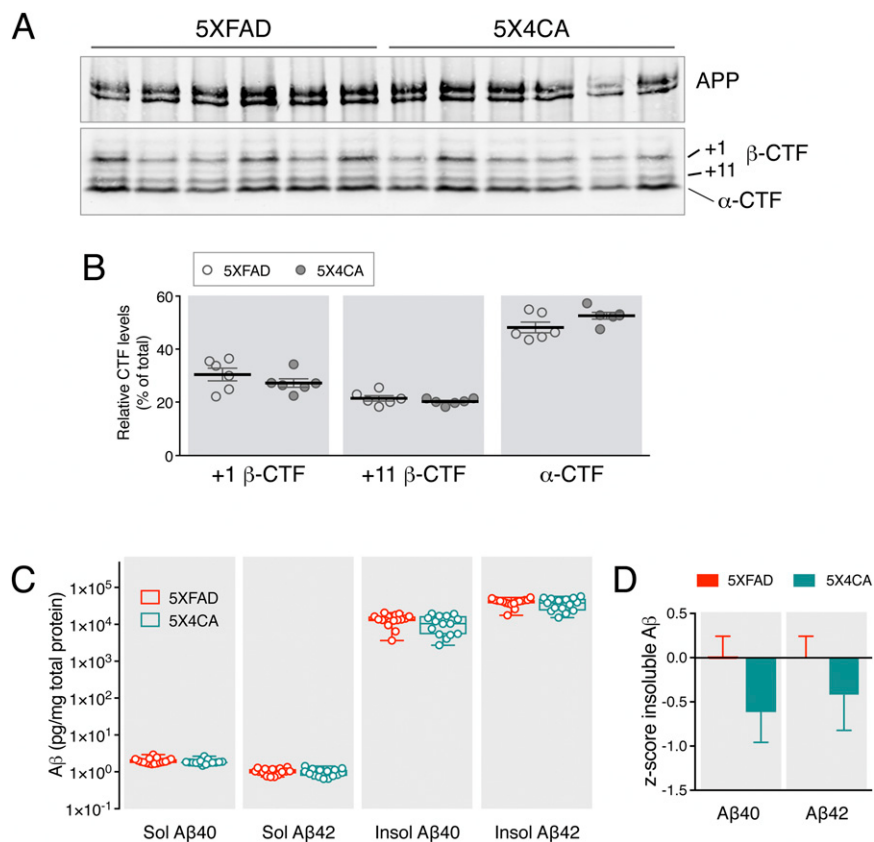

Supplement: pnas.201708568SI.pdf [file pnas.201708568SI.pdf]
